# Supplementary material for: Total Breast Reconstruction with Lipofilling after Traditional Mastectomy without the Use of Tissue Expanders
Source: PubMed Central journal article supplement (PMC10461718; doi:10.1097/prs.0000000000010252), 2023-02-14

**a)**

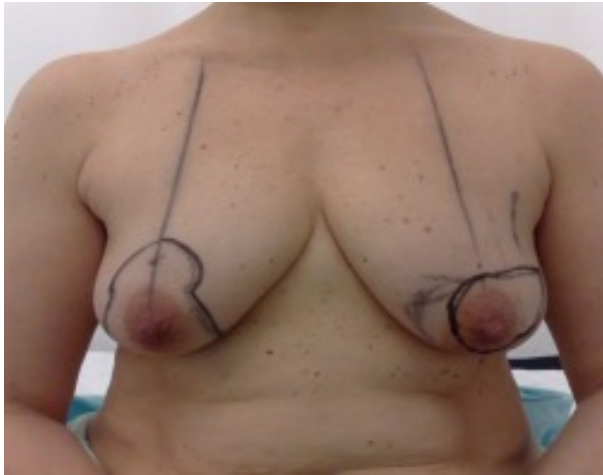

**b)**

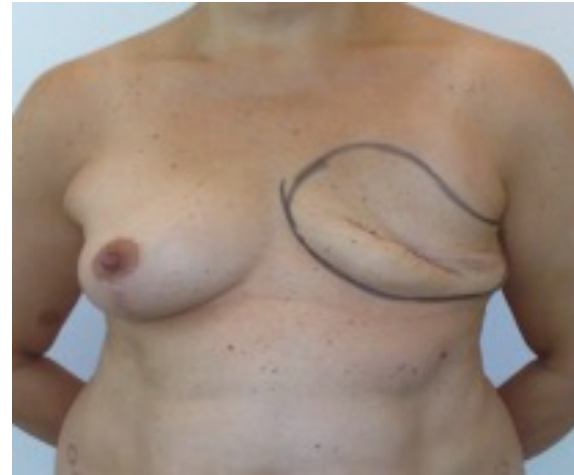

Supplement: prs-152-0483-s001.pdf [file prs-152-0483-s001.pdf]
